# Supplementary material for: Copper and iron metabolism in Ostreococcus tauri – the role of phytotransferrin, plastocyanin and a chloroplast copper-transporting ATPase
Source: Royal Society of Chemistry journal article supplement (doi:10.1039/c9mt00078j), 2019-07-24
Supplement: c9mt00078j2.pdf [file c9mt00078j2.pdf]

## Down

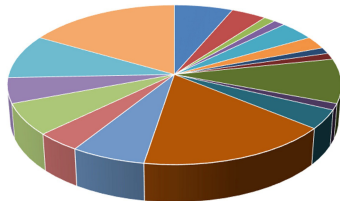

## Up

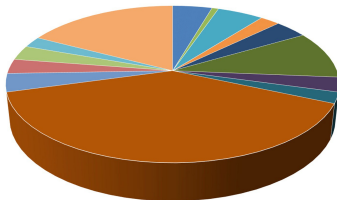

- |                                    |                                  |                                    |
|------------------------------------|----------------------------------|------------------------------------|
| ■ Carbohydrate Metabolic Processes | ■ Carbon Metabolism              | ■ Copper Homeostasis and Transport |
| ■ Cytoskeleton                     | ■ Development and Growth         | ■ Fatty Acids and Lipids           |
| ■ Heme and Chlorophyll             | ■ Iron Homeostasis and Transport | ■ Metabolism                       |
| ■ Photosynthesis                   | ■ Protease / Peptidase           | ■ Regulatory                       |
| ■ Signaling                        | ■ Stress and Redox response      | ■ Trafficking                      |
| ■ Translation                      | ■ Transport                      | ■ Unknown                          |
