# Supplementary material for: Copper and iron metabolism in Ostreococcus tauri – the role of phytotransferrin, plastocyanin and a chloroplast copper-transporting ATPase
Source: Royal Society of Chemistry journal article supplement (doi:10.1039/c9mt00078j), 2019-07-24
Supplement: c9mt00078j9.xlsx [file c9mt00078j9.xlsx]

## Sheet: Sheet6
		Blue Native electrophoresis			Triton X-100 electrophoresis
Accession	Description	Score	Coverage	# Peptides	Score	Coverage	# Peptides
ostta18g01980	FEA1	110.238	44.87	25	20.8761	14.23	6
ostta18g01890	Ribulose bisphosphate carboxylase, small chain	101.154	32.62	5	179.457	66.46	9
ostta10g03420	Glyceraldehyde 3-phosphate dehydrogenase, NAD(P) binding domain	92.1315	51.84	16	45.9701	46.32	15
ostta10g02630	Leucine aminopeptidase/peptidase B	45.2031	28.95	11	5.59033	9.21	4
ostta12g00210	unnamed product	36.6015	13.71	10	38.9406	21.48	16
ostta01g01560	Glyceraldehyde 3-phosphate dehydrogenase, NAD(P) binding domain	35.9871	24.82	8	9.89432	12.78	4
ostta10g01280	Histidine kinase-like ATPase, ATP-binding domain	28.025	16.21	9	5.30033	3.73	2
ostta02g01020	Heat shock protein 70 family	22.7143	4.27	3	9.29779	4.27	3
ostta15g01700	Urease alpha-subunit, N-terminal	21.8576	8.93	6	2.7985	5	2
ostta17g02030	Heat shock protein 70 family	20.9332	11.08	5	8.25096	7.23	3
ostta01g06340	Histone H4	19.3	42.72	4	8.18541	40.78	4
ostta02g00100	Histone core	12.7042	20.98	3	5.89264	11.19	2
ostta07g03380	Helicase, C-terminal	10.9383	11.38	4	2.61436	6.3	2
ostta02g00610	ATPase, F1 complex beta subunit/V1 complex, C-terminal	9.70657	4.72	2	3.73491	8.87	2
ostta17g00510	Arsenite methyltransferase	8.04895	12.1	4	97.7953	76.79	20
ostta16g00430	Actin/actin-like conserved site	7.79815	8.75	3	2.19571	8.75	3
ostta12g00990	Histone core	7.68949	23.89	3	0	23.89	3
ostta04g01980	Glycosyl transferase, family 35	6.62702	2.82	2	8.98727	4.44	3
ostta10g03200	Pyridoxal phosphate-dependent transferase, major region, subdomain 1	5.40242	3.83	3	3.79903	3.73	3
ostta08g00200	Histone core	3.74629	11.76	2	3.77782	10.29	2
