# Supplementary figures and images for: Copper and iron metabolism in Ostreococcus tauri – the role of phytotransferrin, plastocyanin and a chloroplast copper-transporting ATPase
Source: Royal Society of Chemistry journal article supplement (doi:10.1039/c9mt00078j), 2019-07-24

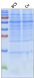

Supplement: c9mt00078j3.pdf [file c9mt00078j3.pdf]

| - Fe |      | + Fe |      |
|------|------|------|------|
| - Cu | x Cu | - Cu | x Cu |

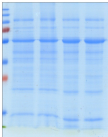

Supplement: c9mt00078j6.pdf [file c9mt00078j6.pdf]
